# Supplementary material
Source: PubMed Central journal article supplement (PMC9906815)

**A.**Locomotion  
No-Stress HC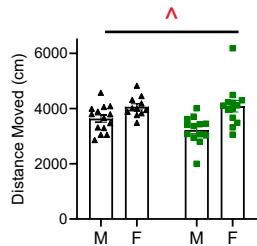**B.**Locomotion  
No-Stress OF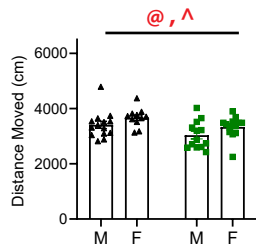

@ = main effect of Alcohol,

^ = main effect of Sex

**C.**Locomotion  
Stress HC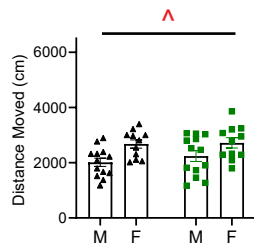**D.**Locomotion  
Stress OF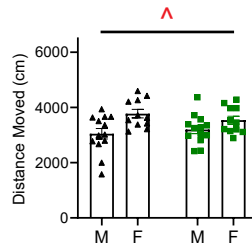

Supplement: NIHMS1822222-supplement-fS1.pdf [file NIHMS1822222-supplement-fS1.pdf]
