# Supplementary material
Source: PubMed Central journal article supplement (PMC9906815)

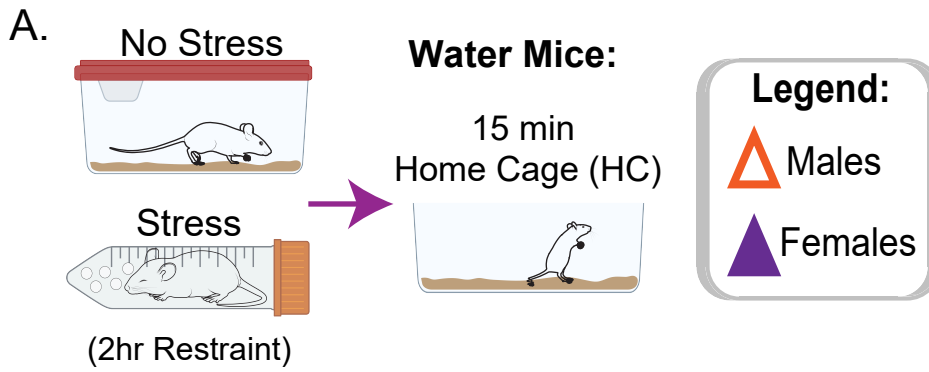

% = main effect of Stress, ^ = main effect of Sex, & = Interaction

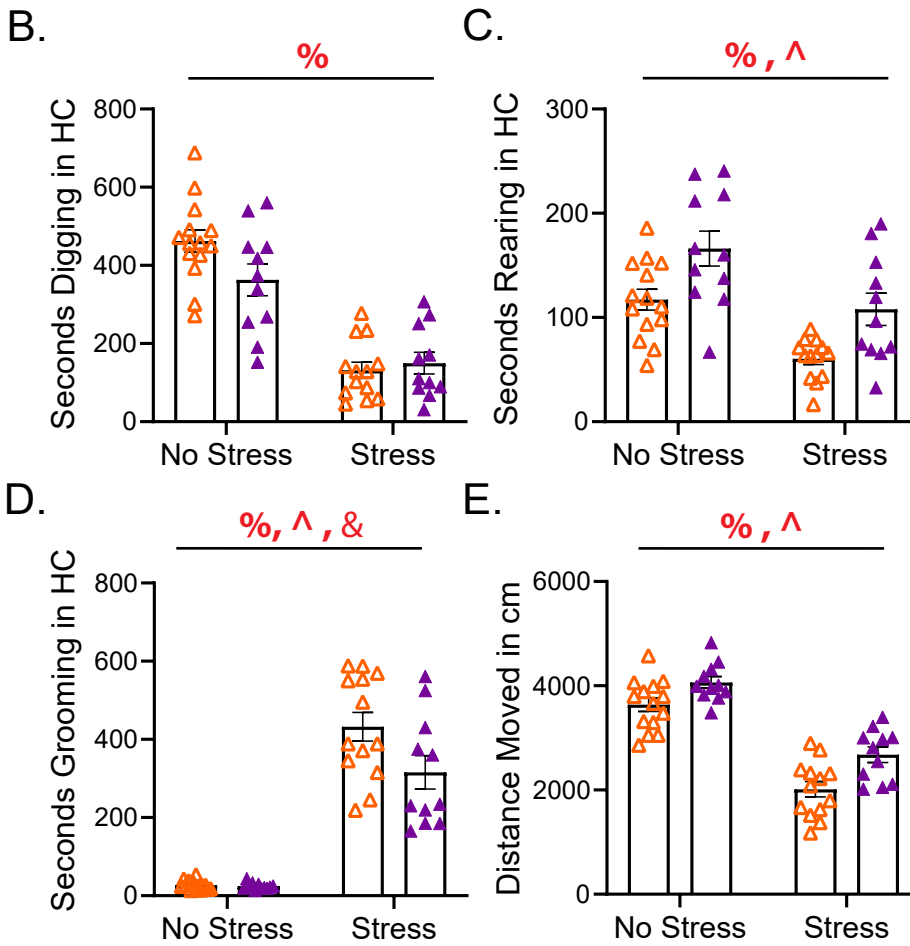

Supplement: NIHMS1822222-supplement-fS2.pdf [file NIHMS1822222-supplement-fS2.pdf]

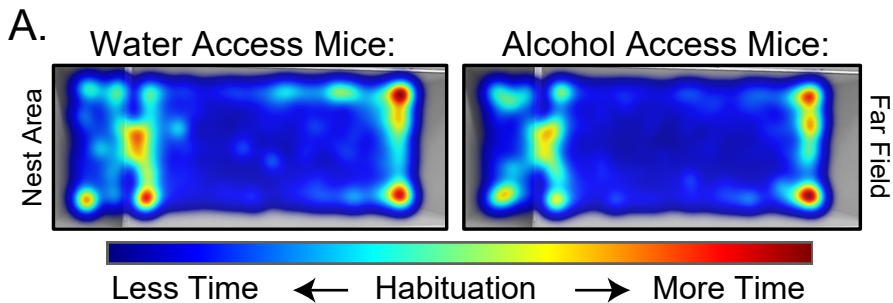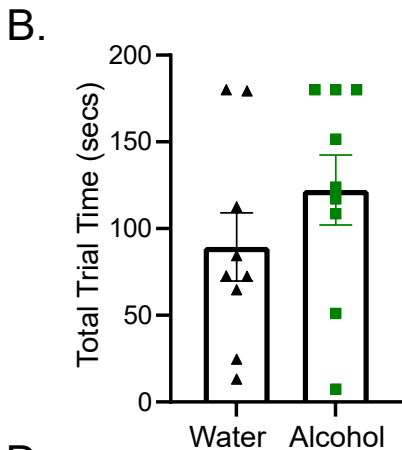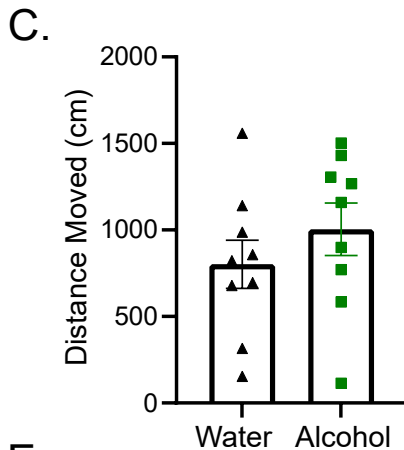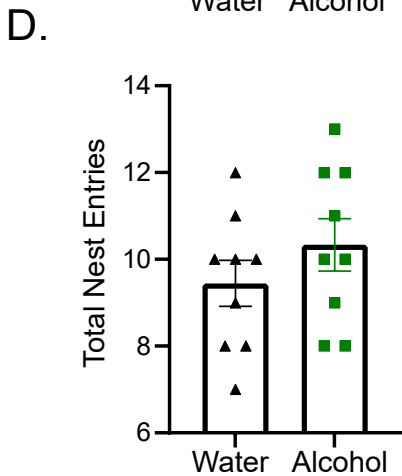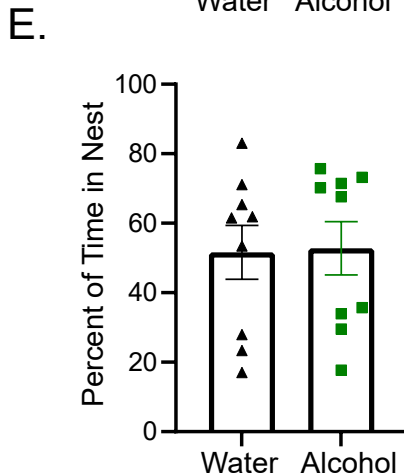

Supplement: NIHMS1822222-supplement-fS3.pdf [file NIHMS1822222-supplement-fS3.pdf]
